# Supplementary material for: Synthesis of functionalized Fe 3 O 4 /zeolite-HY based on dendrimer-like nitrogen-containing compounds and investigating their application in removing Nickel and Lead as a new absorbent
Source: Research Square preprint supplement (doi:10.21203/rs.3.rs-7642772/v1), 2025-11-12
Supplement: Supplementary file 1 [file 98639449a9d98f6856e3afb8.docx]

**Synthesis of functionalized Fe3O4/zeolite-HY based on dendrimer-like nitrogen-containing compounds and investigating their application in removing Nickel and Lead as a new absorbent**

Alireza Orashzada, and Kaveh Khosravi*a,b

*aDepartment of Chemistry, Faculty of Science, Arak University, Arak 38156-88349, Iran.*

*bDepartment of Chemistry, Faculty of Science, Arak University, Arak 38156-88349, Iran*

E- mail: [k-khosravi@araku.ac.ir](mailto:k-khosravi@araku.ac.ir); [khosravi.kveh@gmail.com](mailto:khosravi.kveh@gmail.com) ; Alireza.orashzad@gmail.com


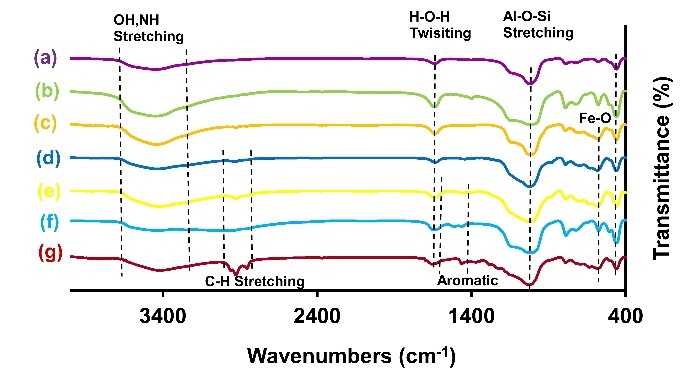


**Fig 1:** FT-IR spectra of a) NaY b) HYZ c) Fe3O4/ HYZ d) Fe3O4/HYZ@SiO2 e) Fe3O4/HYZ@SiO2-Tris f) Fe3O4/HYZ@SiO2-Tris-TCT g) Fe3O4/HYZ@SiO2-Tris-TCT-DAPT


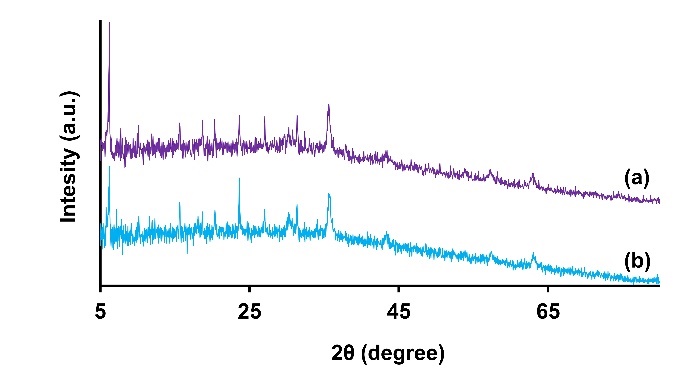


**Fig 2:** XRD patterns of a) Fe3O4/ HYZ and b) Fe3O4/HYZ@SiO2-Tris-TCT-DAPT.


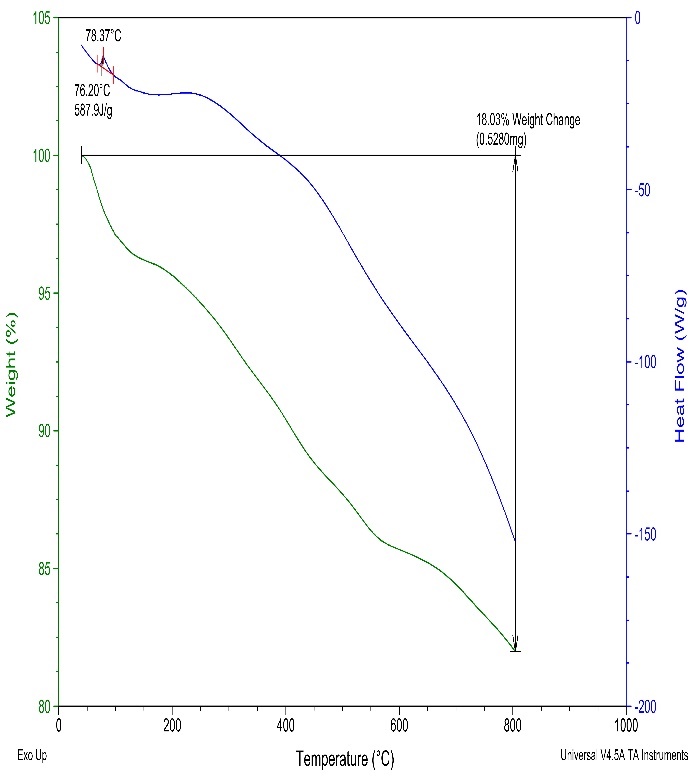


**Fig 3:** TGA-DSC curve of Fe3O4/HYZ@SiO2-Tris-TCT-DAPT


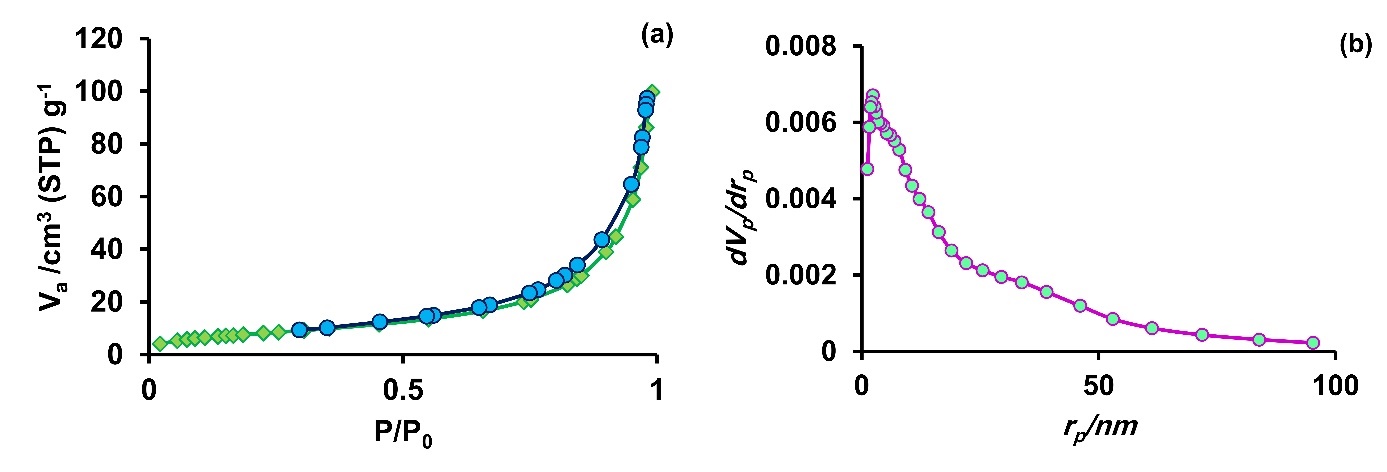


**Fig 4:** a) N2 adsorption–desorption isotherm and b) pore size distribution of Fe3O4/HYZ@SiO2-Tris-TCT-DAPT


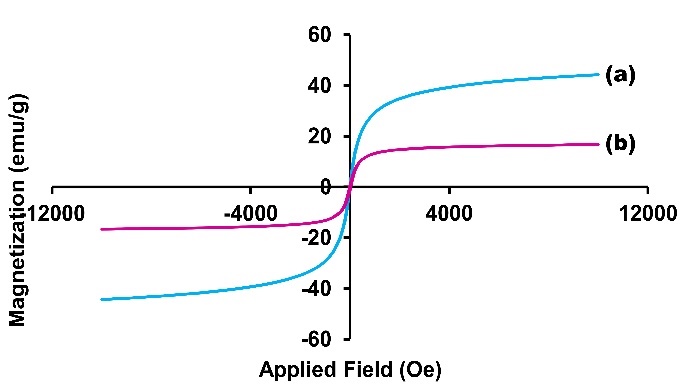


**Fig 5:** VSM spectra of a) Fe3O4 b) Fe3O4/HYZ@SiO2-Tris-TCT-DAPT


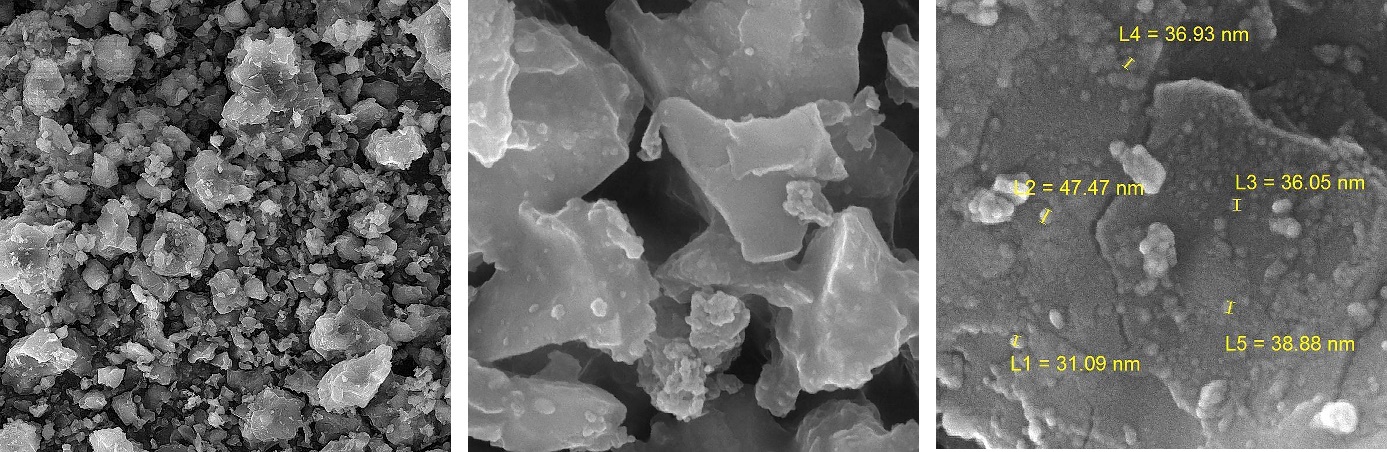


**Fig 6:** FE-SEM images of Fe3O4/HYZ@SiO2-Tris-TCT-DAPT


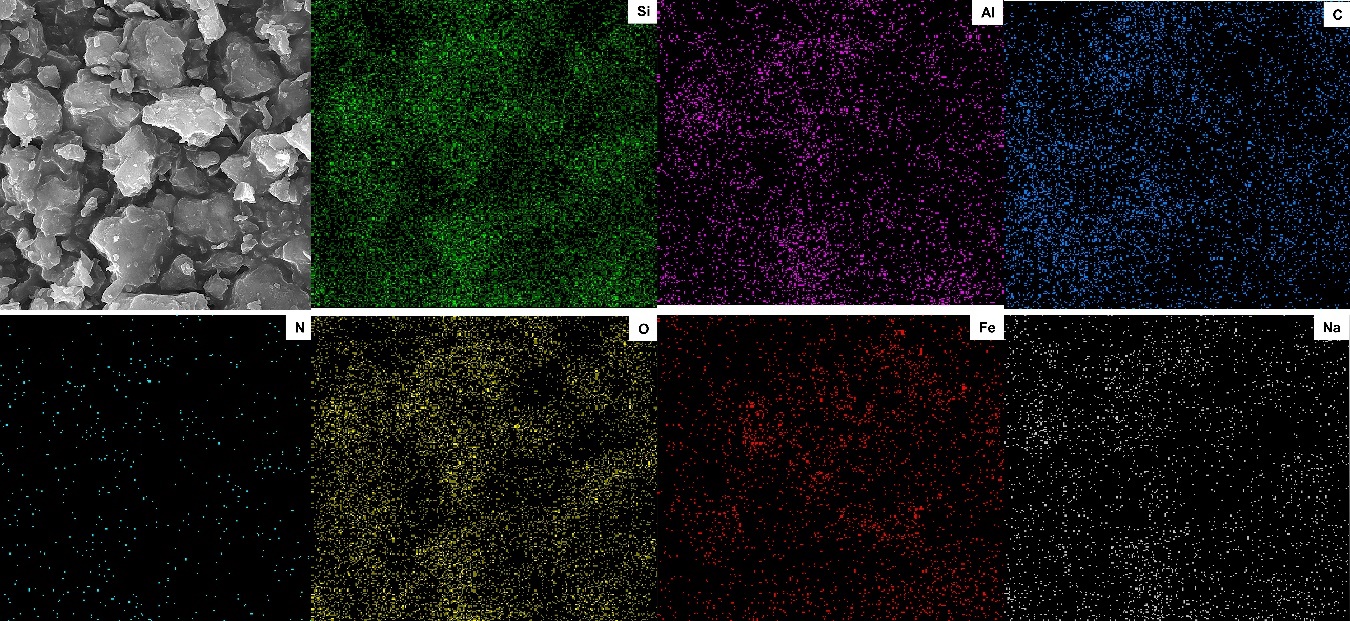


**Fig 7:** SEM image of Fe3O4/HYZ@SiO2-Tris-TCT-DAPT and elemental mapping of Si, Al, C, N, O, Fe and Na


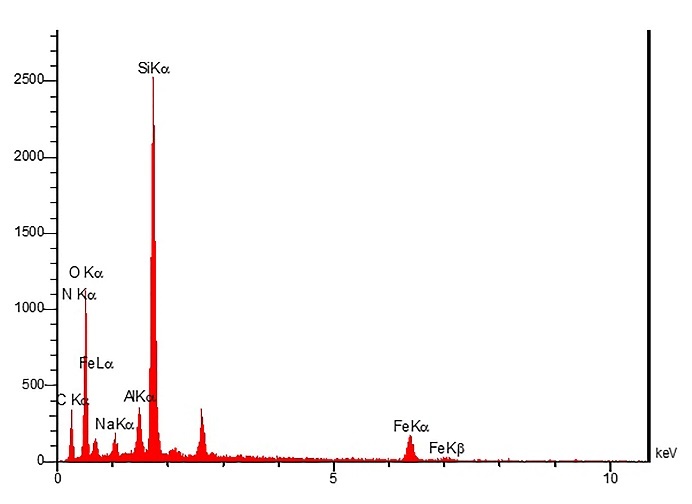


**Fig 8:** EDX spectrum of Fe3O4/HYZ@SiO2-Tris-TCT-DAPT


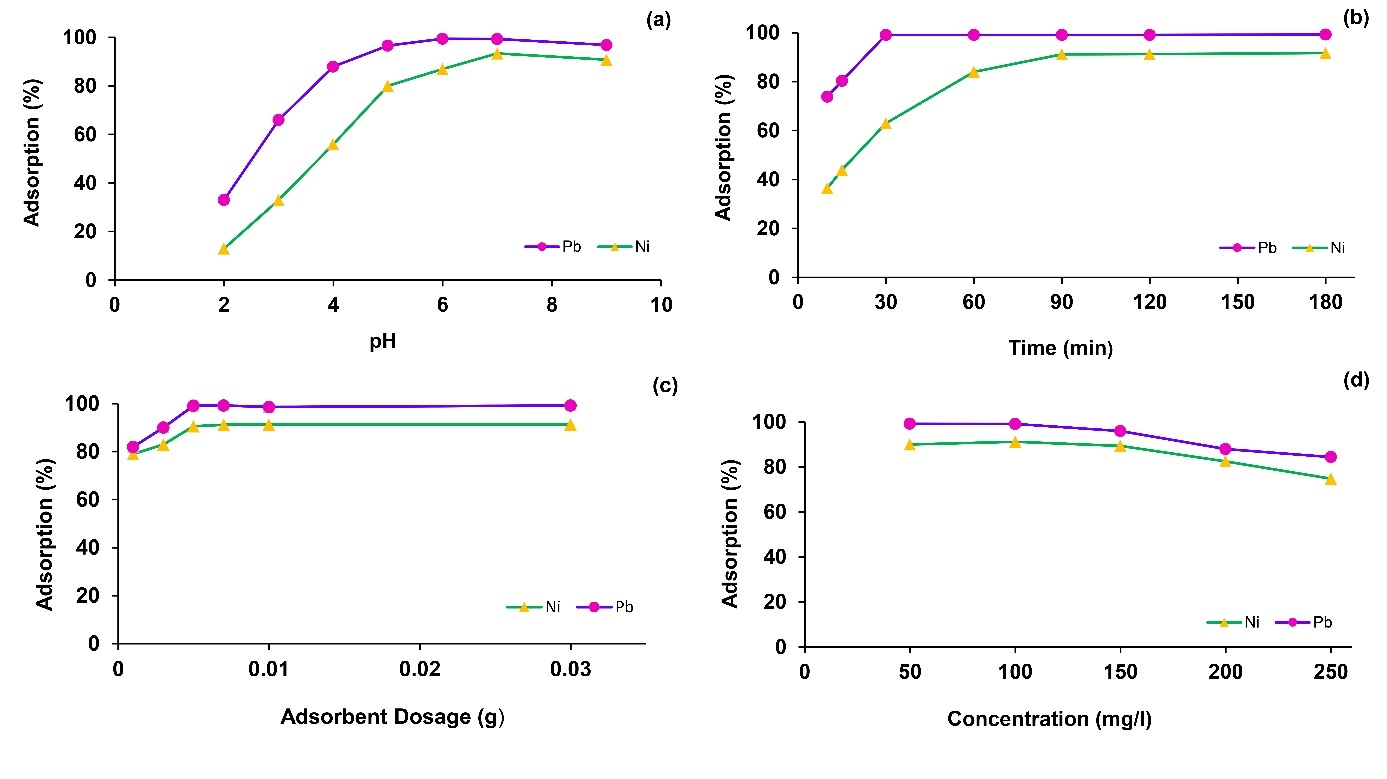


**Fig 9:** The effect of a) pH b) contact time c) adsorbent dosage d) metal ions concentration


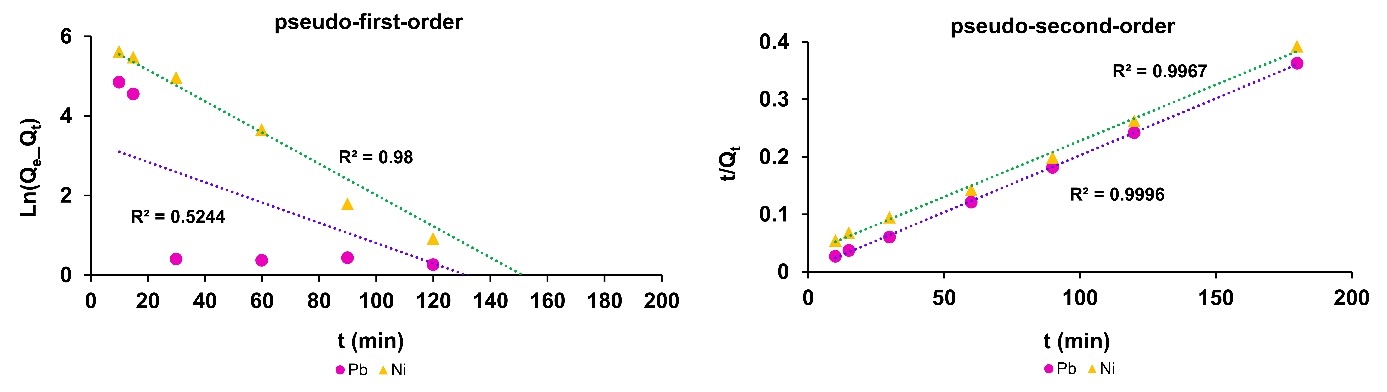


**Fig 10:** The kinetic models for Ni2+ and Pb2+ onFe3O4/HYZ@SiO2-Tris-TCT-DAPT


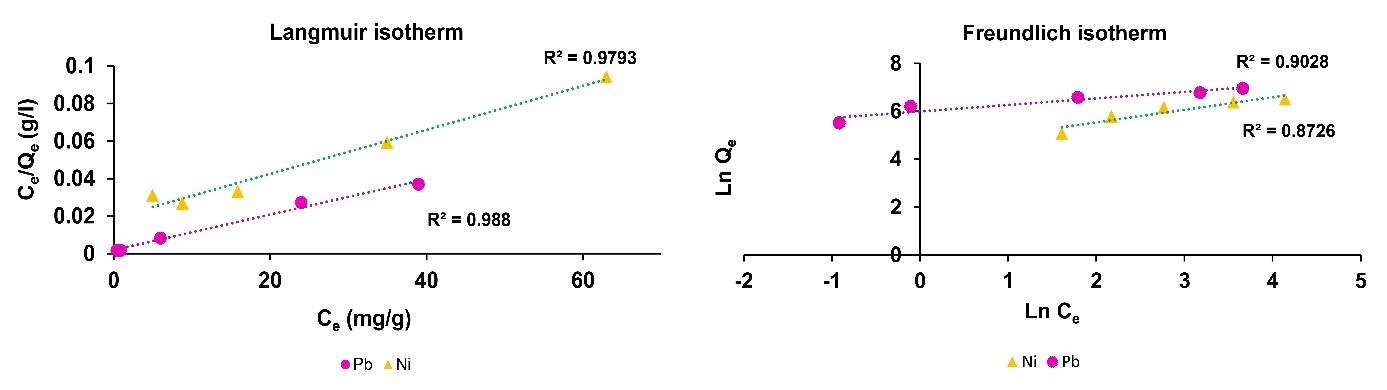


**Fig 11:** Pb2+ and Ni2+ adsorption isotherms


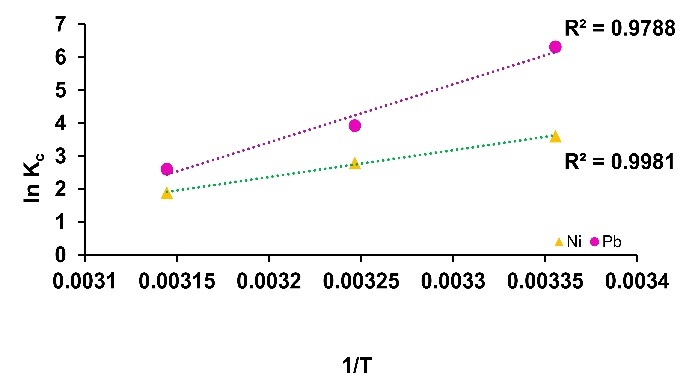


**Fig 12.** Determination of thermodynamic properties of adsorption of Pb2+ and Ni2+ by Fe3O4/HYZ@SiO2-Tris-TCT-DAPT


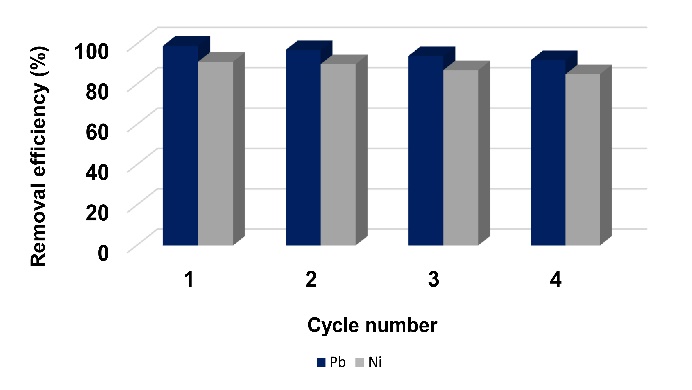


**Fig 13.** The reusability of Fe3O4/HYZ@SiO2-Tris-TCT-DAPT for Pb2+ and Ni2+ removal in four consecutive cycles


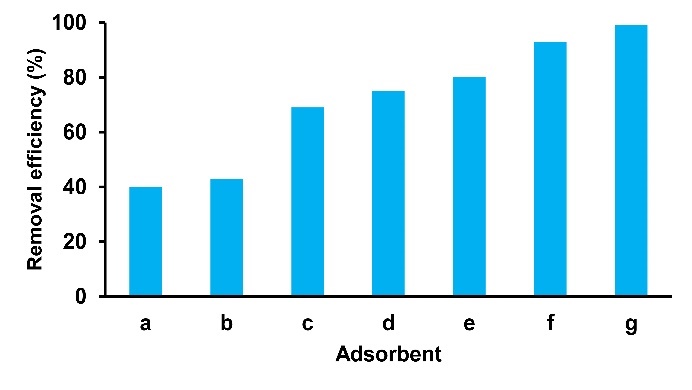


**Fig 14.** The effect of functionalization steps on the removal efficiency of Pb (II); 25 ml solution, concentration 100 mg/L, adsorbent dose 0.005 g, and contact time 30 min; a) NaY b) HYZ c) Fe3O4/ HYZ d) Fe3O4/HYZ@SiO2 e) Fe3O4/HYZ@SiO2-Tris f) Fe3O4/HYZ@SiO2-Tris-TCT g) Fe3O4/HYZ@SiO2-Tris-TCT-DAPT
